# Supplementary material for: Growth of monodispersed SrTiO3 nanocubes by thermohydrolysis method
Source: Royal Society of Chemistry journal article supplement (doi:10.1039/c1ce05296a), 2011-01-01
Supplement: c1ce05296a.pdf [file c1ce05296a.pdf]

Supporting information

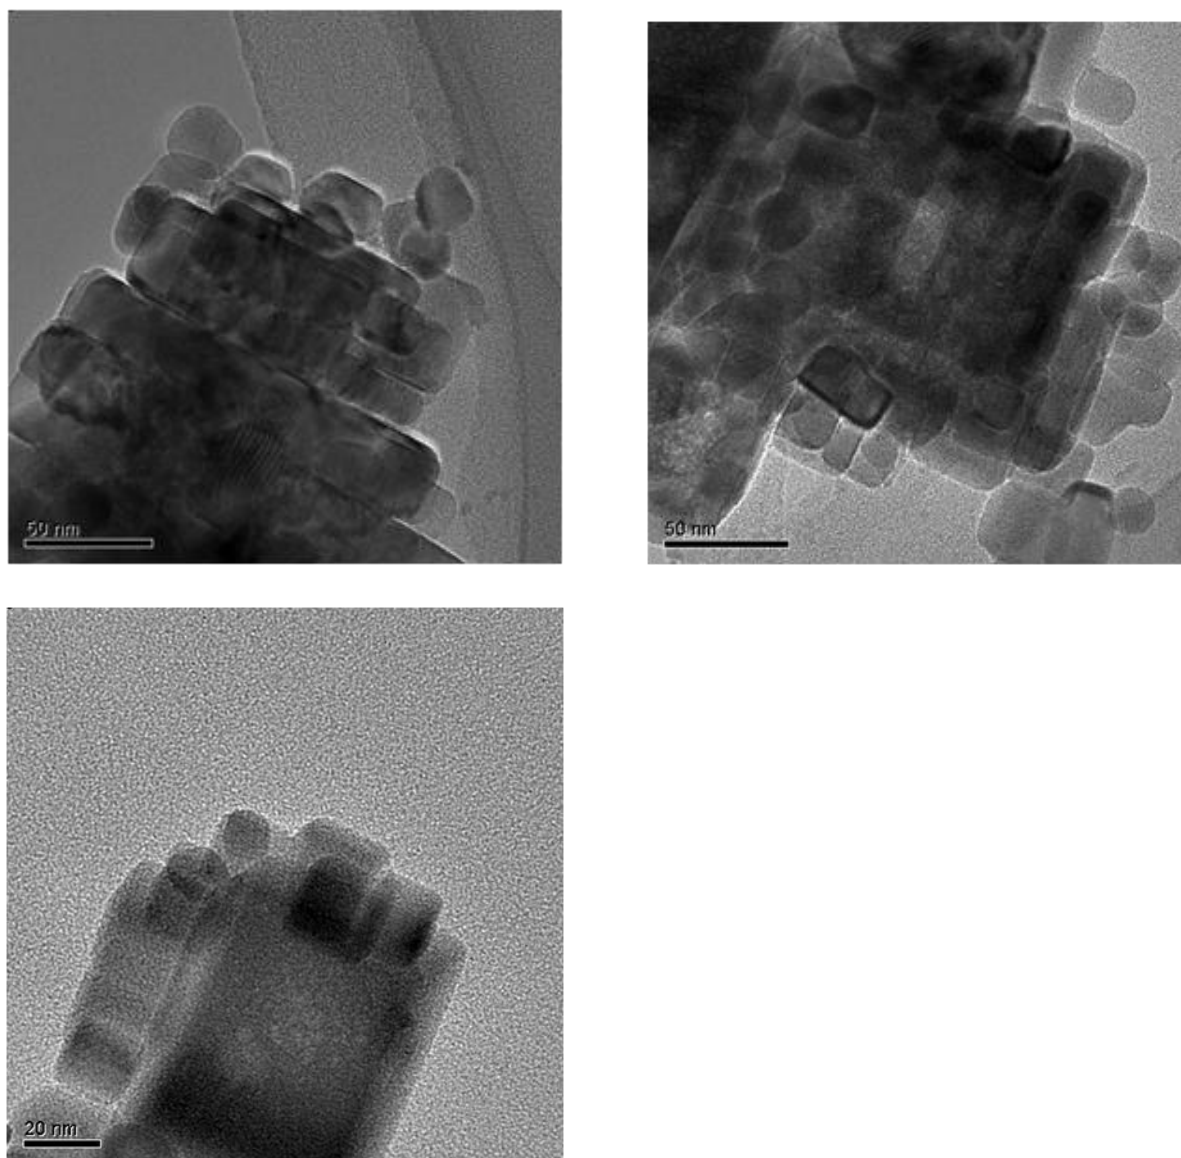

Fig. S1 TEM images of the large SrTiO<sub>3</sub> cubic particles synthesized at Sr:OLA:hydrazine = 1:2:4 for 72h

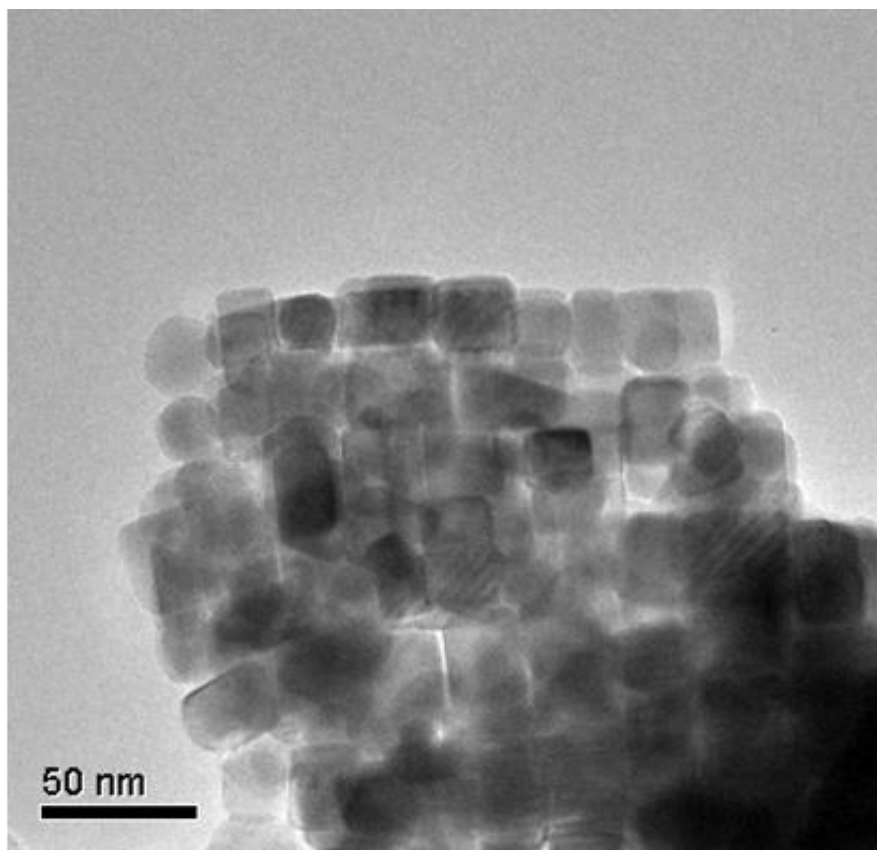

Fig.S2 TEM images of the SrTiO<sub>3</sub> aggregates synthesized at Sr:OLA:hydrazine = 1:2:4 for 72h

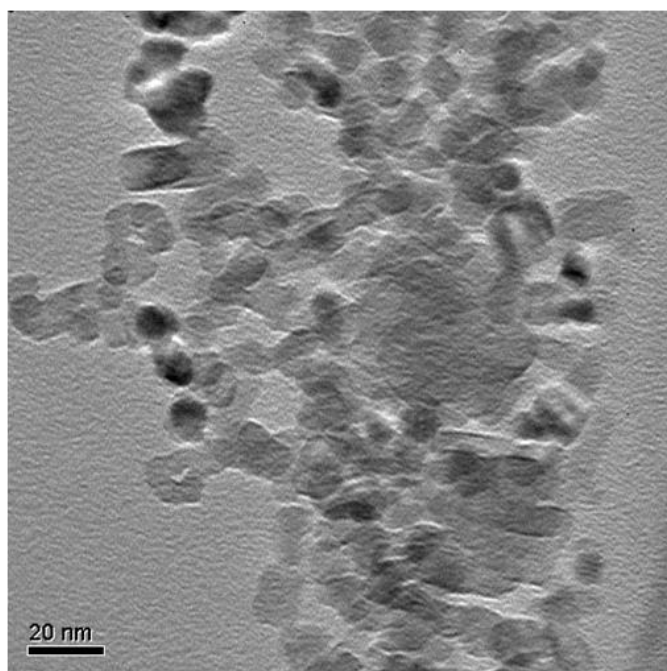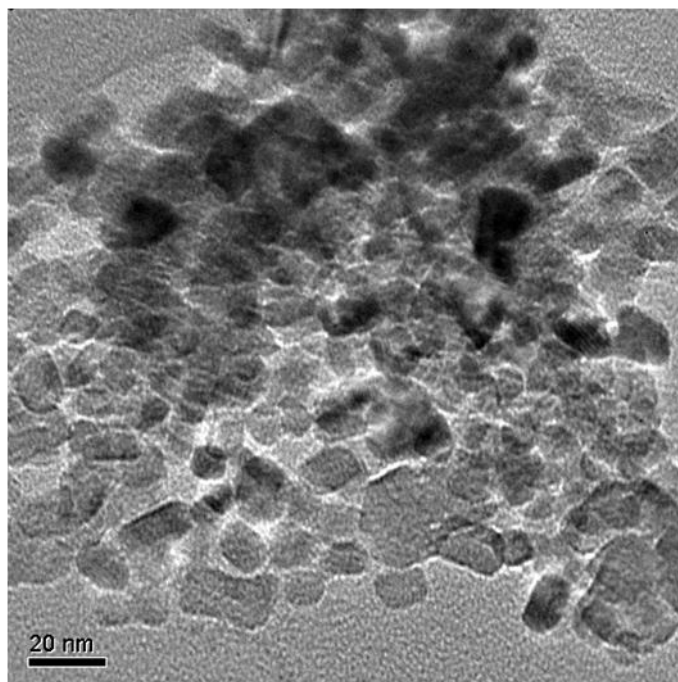

Fig.S3 TEM images of the SrTiO<sub>3</sub> particles synthesized at Sr:OLA:hydrazine = 1:2:4 for 48h through adding TALH into the aqueous solution with pH 14 at first
